# Supplementary material for: Comprehensive Investigation of the Differences of the Roots of Wild and Cultivated Mirabilis himalaica (Edgew) Heim Based on Macroscopic and Microscopic Identification Using HPLC Fingerprint
Source: Hindawi journal article supplement (doi:10.1155/2020/8626439), 2020-01-01
Supplement: f1 [file 8626439.f1.pdf]

## **Supplementary Materials**

The primers:

P1:5'-AGAAGTCGTAACAAGTTTCCGTAGG-3',

P4:5'-CCTCCGCTTATTGATATGC-3',

The reaction system:

Prime STAR ® HS Premix 25 µL (purchased from TAKARA Company), P1(1µL) and P4(1µL), DNA(2.5ng), sterilized distilled water(21.5µL);

The amplification procedures: pre-denaturation at 95°C for 2 minutes, denaturation at 94°C for 30 s, annealing at 55°C for 30 s, extension at 72°C for 80 s, 35 cycles and extension at 72°C for 10 minutes.
